# Supplementary material for: Modeling the response of northwest Greenland to enhanced ocean thermal forcing and subglacial discharge
Source: Copernicus journal article supplement (doi:10.5194/tc-13-723-2019), 2019-03-01
Supplement: Supplementary file 1 [file tc-13-723-2019-supplement.pdf]

Supplement of The Cryosphere, 13, 723–734, 2019  
<https://doi.org/10.5194/tc-13-723-2019-supplement>  
© Author(s) 2019. This work is distributed under  
the Creative Commons Attribution 4.0 License.

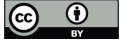

*Supplement of*

## **Modeling the response of northwest Greenland to enhanced ocean thermal forcing and subglacial discharge**

**M. Morlighem et al.**

*Correspondence to:* Mathieu Morlighem ([mathieu.morlighem@uci.edu](mailto:mathieu.morlighem@uci.edu))

The copyright of individual parts of the supplement might differ from the CC BY 4.0 License.
